# Supplementary material for: Diurnal versus spatial variability of greenhouse gas emissions from an anthropogenically modified lowland river in Germany
Source: Copernicus journal article supplement (doi:10.5194/bg-21-1613-2024), 2024-03-28
Supplement: Supplementary file 2 [file bg-21-1613-2024-supplement.zip]

Archive with 3 entries (3 files):
- bg-21-1613-2024-supplement-title-page.pdf
- Koschorreck et al SI.pdf
- timeseries_data.csv
