# Supplementary material for: Diurnal versus spatial variability of greenhouse gas emissions from an anthropogenically modified lowland river in Germany
Source: Copernicus journal article supplement (doi:10.5194/bg-21-1613-2024), 2024-03-28
Supplement: Supplementary file 2 [file bg-21-1613-2024-supplement.zip › bg-21-1613-2024-supplement-title-page.pdf]

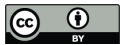

*Supplement of*

**Diurnal versus spatial variability of greenhouse gas emissions from an anthropogenically modified lowland river in Germany**

**Matthias Koschorreck et al.**

*Correspondence to:* Matthias Koschorreck ([matthias.koschorreck@ufz.de](mailto:matthias.koschorreck@ufz.de))

- [bg-21-1613-2024-supplement-title-page.pdf](#)
- [Koschorreck et al SI.pdf](#)
- [timeseries\\_data.csv](#)

The copyright of individual parts of the supplement might differ from the article licence.
