# Supplementary material for: Diurnal versus spatial variability of greenhouse gas emissions from an anthropogenically modified lowland river in Germany
Source: Copernicus journal article supplement (doi:10.5194/bg-21-1613-2024), 2024-03-28
Supplement: Supplementary file 2 [file bg-21-1613-2024-supplement.zip › timeseries_data.csv]

	datetime	site	CO2_flux	CH4_flux	temp	Msoil	light	WL	hour	time_of_day
1	2022-08-18 18:00:00	mud	2.844	NA	26.7	20.5	7.0706524	140.2	18	day
2	2022-08-18 19:00:00	mud	5.076	NA	24.7	20.2	1.984103	140	19	day
3	2022-08-18 20:00:00	mud	5.94	NA	23.3	20.4	0.56933	140	20	night
4	2022-08-18 21:00:00	mud	6.156	NA	22.8	20.2	-0.0203738	140	21	night
5	2022-08-18 22:00:00	mud	6.408	NA	22.4	20.4	-0.0348574	139.2	22	night
6	2022-08-18 23:00:00	mud	6.192	NA	21.9	20.1	-0.0368398	139	23	night
7	2022-08-19 00:00:00	mud	5.472	NA	21.1	20.2	-0.0405012	139	0	night
8	2022-08-19 01:00:00	mud	5.58	NA	21.3	20.3	-0.0408924	139	1	night
9	2022-08-19 02:00:00	mud	5.94	NA	21.1	20.3	-0.0375062	139	2	night
10	2022-08-19 03:00:00	mud	4.716	NA	20.5	20.3	-0.0394386	139	3	night
11	2022-08-19 04:00:00	mud	4.932	NA	20.3	20.3	-0.0402256	139	4	night
12	2022-08-19 05:00:00	mud	4.392	NA	20.1	20.6	-0.0392626	139	5	night
13	2022-08-19 06:00:00	mud	3.528	NA	19.7	20.5	0.1097552	139	6	day
14	2022-08-19 07:00:00	mud	3.672	NA	19.5	20.4	1.578905	139	7	day
15	2022-08-19 08:00:00	mud	3.564	NA	19.5	20.5	2.9497172	139	8	day
16	2022-08-19 09:00:00	mud	2.16	NA	20.3	20.3	2.8499808	138.8	9	day
17	2022-08-19 10:00:00	mud	2.484	NA	20.3	20.1	10.0347614	139	10	day
18	2022-08-19 11:00:00	mud	2.484	NA	20.5	20.4	10.4711294	138.6	11	day
19	2022-08-19 12:00:00	mud	1.692	NA	20.7	19.7	27.052506	138	12	day
20	2022-08-19 13:00:00	mud	-1.008	NA	22.8	19.3	36.6895724	138	13	day
21	2022-08-19 14:00:00	mud	-1.512	NA	23	19.8	30.5633644	138.4	14	day
22	2022-08-19 15:00:00	mud	-0.324	NA	22.4	19.2	29.1873604	138.6	15	day
23	2022-08-19 16:00:00	mud	0.612	NA	22.4	19.3	27.2628592	138.2	16	day
24	2022-08-19 17:00:00	mud	2.34	NA	21.9	19.3	14.5026408	138.2	17	day
25	2022-08-19 18:00:00	mud	1.62	NA	21.9	19.1	5.5984876	138.2	18	day
26	2022-08-19 19:00:00	mud	3.312	NA	21.5	19.1	2.2914708	138	19	day
27	2022-08-19 20:00:00	mud	4.176	NA	20.9	19.2	0.585089	138.2	20	night
28	2022-08-19 21:00:00	mud	4.68	NA	20.1	19.2	-0.0012416	138.2	21	night
29	2022-08-19 22:00:00	mud	4.68	NA	20.1	19.3	-0.0350566	138.4	22	night
30	2022-08-19 23:00:00	mud	4.644	NA	19.7	19.3	-0.0394862	138.8	23	night
31	2022-08-20 00:00:00	mud	4.356	NA	19.3	19.3	-0.039243	139	0	night
32	2022-08-20 01:00:00	mud	4.284	NA	19.5	19.6	-0.0365868	139	1	night
33	2022-08-20 02:00:00	mud	4.284	NA	19.3	19.5	-0.0359512	139.2	2	night
34	2022-08-20 03:00:00	mud	4.176	NA	19.1	19.7	-0.0382364	139.8	3	night
35	2022-08-20 04:00:00	mud	4.5	NA	18.8	19.8	-0.0432838	140	4	night
36	2022-08-20 05:00:00	mud	4.356	NA	18.8	20	-0.0409704	140.2	5	night
37	2022-08-20 06:00:00	mud	3.924	NA	18.4	20	0.3717996	141	6	day
38	2022-08-20 07:00:00	mud	3.06	NA	18.8	20.3	3.5435212	141	7	day
39	2022-08-20 08:00:00	mud	1.044	NA	19.7	20.1	9.7079218	141.6	8	day
40	2022-08-20 09:00:00	mud	-0.036	NA	20.5	20.6	21.8073544	142.2	9	day
41	2022-08-20 10:00:00	mud	-0.828	NA	21.3	20.7	14.3921964	143	10	day
42	2022-08-20 11:00:00	mud	-1.152	NA	21.9	21	18.5262836	143	11	day
43	2022-08-20 12:00:00	mud	-1.332	NA	23.3	21.7	27.490592	143.6	12	day
44	2022-08-20 13:00:00	mud	-1.44	NA	23.3	21.8	16.8339132	143.8	13	day
45	2022-08-20 14:00:00	mud	-1.692	NA	23.5	22.4	19.0316012	144	14	day
46	2022-08-20 15:00:00	mud	-1.692	NA	23.9	22.8	24.4559656	144.8	15	day
47	2022-08-20 16:00:00	mud	-1.116	NA	23.7	23.2	26.110268	145	16	day
48	2022-08-20 17:00:00	mud	-1.512	NA	22.4	29.7	16.5966724	145.2	17	day
49	2022-08-20 18:00:00	mud	0.072	NA	21.7	30	11.3255964	145.4	18	day
50	2022-08-20 19:00:00	mud	1.584	NA	21.3	30.1	8.820762	145.2	19	day
51	2022-08-20 20:00:00	mud	2.268	NA	20.9	30.2	2.1547194	146	20	night
52	2022-08-20 21:00:00	mud	2.952	NA	19.5	30.5	0.0410806	146	21	night
53	2022-08-20 22:00:00	mud	2.844	NA	18.6	30.9	-0.036251	146.2	22	night
54	2022-08-20 23:00:00	mud	2.88	NA	18	30.9	-0.0390228	146.2	23	night
55	2022-08-21 00:00:00	mud	2.772	NA	17.5	31	-0.0387338	146.8	0	night
56	2022-08-21 01:00:00	mud	2.556	NA	17.3	31.3	-0.0436914	147	1	night
57	2022-08-21 02:00:00	mud	2.664	NA	17	31.8	-0.0403614	147	2	night
58	2022-08-21 03:00:00	mud	2.376	NA	16.7	32.1	-0.0420904	147	3	night
59	2022-08-21 04:00:00	mud	2.268	NA	16	32.6	-0.0415088	147.2	4	night
60	2022-08-21 05:00:00	mud	2.268	NA	15	33	-0.0397186	148	5	night
61	2022-08-21 06:00:00	mud	2.124	NA	14.6	33.7	0.362922	148	6	day
62	2022-08-21 07:00:00	mud	1.296	NA	14.9	34	3.718673	148	7	day
63	2022-08-21 08:00:00	mud	-0.072	NA	16.7	34.2	11.1126308	148	8	day
64	2022-08-21 09:00:00	mud	-1.152	NA	19.3	34.1	24.402234	148	9	day
65	2022-08-21 10:00:00	mud	-1.728	NA	22.8	34.2	34.476492	148	10	day
66	2022-08-21 11:00:00	mud	-1.8	NA	25.4	34	47.753128	148	11	day
67	2022-08-21 12:00:00	mud	-1.692	NA	26.2	34.1	58.8856152	148	12	day
68	2022-08-21 13:00:00	mud	-1.908	NA	26.2	34.3	32.954826	148	13	day
69	2022-08-21 14:00:00	mud	-2.34	NA	25.4	34.2	39.2489636	148	14	day
70	2022-08-21 15:00:00	mud	-2.052	NA	24.7	34.3	27.70318	148	15	day
71	2022-08-21 16:00:00	mud	-2.088	NA	26.7	33.9	36.900656	148	16	day
72	2022-08-21 19:00:00	mud	-0.18	NA	22.8	29.4	11.729076	148	19	day
73	2022-08-21 20:00:00	mud	1.512	NA	21.3	28.4	1.8557884	148	20	night
74	2022-08-21 21:00:00	mud	2.304	NA	19.5	25.9	0.0045036	148	21	night
75	2022-08-21 22:00:00	mud	2.448	NA	18.4	25.2	-0.041016	148	22	night
76	2022-08-21 23:00:00	mud	2.376	NA	17.3	25	-0.0416294	148	23	night
77	2022-08-22 00:00:00	mud	2.34	NA	16.8	24.7	-0.0421144	148	0	night
78	2022-08-22 01:00:00	mud	2.196	NA	16.5	24.3	-0.0439384	147.6	1	night
79	2022-08-22 02:00:00	mud	2.232	NA	15.7	23.7	-0.0409612	147	2	night
80	2022-08-22 03:00:00	mud	2.412	NA	15	23.2	-0.0428946	147	3	night
81	2022-08-22 04:00:00	mud	2.304	NA	14.4	23.2	-0.0405984	147	4	night
82	2022-08-22 05:00:00	mud	2.016	NA	14	22.6	-0.040203	147	5	night
83	2022-08-22 06:00:00	mud	1.8	NA	14.1	22.2	0.2316998	146.6	6	day
84	2022-08-22 07:00:00	mud	1.476	NA	14.3	22	2.4908548	146	7	day
85	2022-08-22 08:00:00	mud	0.108	NA	16.5	21.6	12.2694908	146	8	day
86	2022-08-18 19:00:00	sand	1.512	NA	31.4	1	1.984103	140	19	day
87	2022-08-18 20:00:00	sand	1.764	NA	27.5	1	0.56933	140	20	night
88	2022-08-18 21:00:00	sand	1.584	NA	26.2	1	-0.0203738	140	21	night
89	2022-08-18 22:00:00	sand	1.692	NA	25.6	1	-0.0348574	139.2	22	night
90	2022-08-18 23:00:00	sand	1.62	NA	24.2	1	-0.0368398	139	23	night
91	2022-08-19 00:00:00	sand	1.584	NA	22.8	1.3	-0.0405012	139	0	night
92	2022-08-19 01:00:00	sand	1.368	NA	22.4	1.3	-0.0408924	139	1	night
93	2022-08-19 02:00:00	sand	1.476	NA	22.1	1.5	-0.0375062	139	2	night
94	2022-08-19 03:00:00	sand	1.656	NA	21.5	0	-0.0394386	139	3	night
95	2022-08-19 04:00:00	sand	1.584	NA	21.1	0	-0.0402256	139	4	night
96	2022-08-19 05:00:00	sand	1.692	NA	20.9	1.7	-0.0392626	139	5	night
97	2022-08-19 06:00:00	sand	1.656	NA	20.5	1	0.1097552	139	6	day
98	2022-08-19 07:00:00	sand	1.908	NA	20.3	1	1.578905	139	7	day
99	2022-08-19 08:00:00	sand	2.052	NA	20.3	1	2.9497172	139	8	day
100	2022-08-19 09:00:00	sand	2.124	NA	20.9	1.1	2.8499808	138.8	9	day
101	2022-08-19 10:00:00	sand	2.448	NA	21.1	1.3	10.0347614	139	10	day
102	2022-08-19 11:00:00	sand	1.908	NA	21.3	1.5	10.4711294	138.6	11	day
103	2022-08-19 12:00:00	sand	2.052	NA	21.5	0	27.052506	138	12	day
104	2022-08-19 13:00:00	sand	2.376	NA	23.5	0	36.6895724	138	13	day
105	2022-08-19 14:00:00	sand	2.16	NA	24.9	0	30.5633644	138.4	14	day
106	2022-08-19 15:00:00	sand	1.872	NA	25.4	0	29.1873604	138.6	15	day
107	2022-08-19 16:00:00	sand	1.656	NA	25.1	0	27.2628592	138.2	16	day
108	2022-08-19 17:00:00	sand	1.656	NA	24.7	0	14.5026408	138.2	17	day
109	2022-08-19 18:00:00	sand	1.656	NA	24.4	0	5.5984876	138.2	18	day
110	2022-08-19 19:00:00	sand	1.44	NA	23.9	0	2.2914708	138	19	day
111	2022-08-19 20:00:00	sand	1.368	NA	23.3	0	0.585089	138.2	20	night
112	2022-08-19 21:00:00	sand	1.188	NA	21.9	0	-0.0012416	138.2	21	night
113	2022-08-19 22:00:00	sand	1.152	NA	21.7	0	-0.0350566	138.4	22	night
114	2022-08-19 23:00:00	sand	1.26	NA	21.3	0	-0.0394862	138.8	23	night
115	2022-08-20 00:00:00	sand	1.224	NA	20.7	0	-0.039243	139	0	night
116	2022-08-20 01:00:00	sand	1.548	NA	20.7	0	-0.0365868	139	1	night
117	2022-08-20 02:00:00	sand	0.684	NA	20.3	0	-0.0359512	139.2	2	night
118	2022-08-20 03:00:00	sand	0.864	NA	20.1	0	-0.0382364	139.8	3	night
119	2022-08-20 04:00:00	sand	0.936	NA	19.7	0	-0.0432838	140	4	night
120	2022-08-20 05:00:00	sand	0.576	NA	19.5	0	-0.0409704	140.2	5	night
121	2022-08-20 06:00:00	sand	1.08	NA	19.3	1.3	0.3717996	141	6	day
122	2022-08-20 07:00:00	sand	1.224	NA	19.5	1.3	3.5435212	141	7	day
123	2022-08-20 08:00:00	sand	1.404	NA	20.3	1.3	9.7079218	141.6	8	day
124	2022-08-20 09:00:00	sand	1.656	NA	21.1	1.6	21.8073544	142.2	9	day
125	2022-08-20 10:00:00	sand	1.656	NA	21.9	0	14.3921964	143	10	day
126	2022-08-20 11:00:00	sand	1.476	NA	23.5	0	18.5262836	143	11	day
127	2022-08-20 12:00:00	sand	1.512	NA	25.1	0	27.490592	143.6	12	day
128	2022-08-20 13:00:00	sand	1.296	NA	26.4	0	16.8339132	143.8	13	day
129	2022-08-20 14:00:00	sand	1.368	NA	26.9	0	19.0316012	144	14	day
130	2022-08-20 15:00:00	sand	1.368	NA	27.5	0	24.4559656	144.8	15	day
131	2022-08-20 16:00:00	sand	1.368	NA	28	0	26.110268	145	16	day
132	2022-08-20 17:00:00	sand	1.26	NA	26.7	0	16.5966724	145.2	17	day
133	2022-08-20 18:00:00	sand	1.044	NA	25.4	0	11.3255964	145.4	18	day
134	2022-08-20 19:00:00	sand	0.9	NA	24.7	1.6	8.820762	145.2	19	day
135	2022-08-20 20:00:00	sand	0.828	NA	23.7	1.6	2.1547194	146	20	night
136	2022-08-20 21:00:00	sand	0.792	NA	21.9	1.6	0.0410806	146	21	night
137	2022-08-20 22:00:00	sand	0.648	NA	20.5	1.6	-0.036251	146.2	22	night
138	2022-08-20 23:00:00	sand	0.576	NA	19.5	1.6	-0.0390228	146.2	23	night
139	2022-08-21 00:00:00	sand	0.792	NA	18.8	1.6	-0.0387338	146.8	0	night
140	2022-08-21 01:00:00	sand	0.828	NA	18.8	1.6	-0.0436914	147	1	night
141	2022-08-21 02:00:00	sand	0.792	NA	18.6	1.6	-0.0403614	147	2	night
142	2022-08-21 03:00:00	sand	0.612	NA	18.2	1.5	-0.0420904	147	3	night
143	2022-08-21 04:00:00	sand	0.54	NA	17.2	1.5	-0.0415088	147.2	4	night
144	2022-08-21 05:00:00	sand	0.36	NA	16.2	1.6	-0.0397186	148	5	night
145	2022-08-21 06:00:00	sand	0.504	NA	15.4	1.6	0.362922	148	6	day
146	2022-08-21 07:00:00	sand	0.648	NA	15.4	1.5	3.718673	148	7	day
147	2022-08-21 08:00:00	sand	0.72	NA	16.7	1.5	11.1126308	148	8	day
148	2022-08-21 09:00:00	sand	1.008	NA	17.9	1.5	24.402234	148	9	day
149	2022-08-21 10:00:00	sand	1.152	NA	20.5	1.6	34.476492	148	10	day
150	2022-08-21 11:00:00	sand	1.152	NA	22.6	1.6	47.753128	148	11	day
151	2022-08-21 12:00:00	sand	1.08	NA	24.4	0	58.8856152	148	12	day
152	2022-08-21 13:00:00	sand	1.44	NA	29.2	0	32.954826	148	13	day
153	2022-08-21 14:00:00	sand	0.72	NA	31.1	0	39.2489636	148	14	day
154	2022-08-21 15:00:00	sand	0.576	NA	30.4	0	27.70318	148	15	day
155	2022-08-21 16:00:00	sand	0.648	NA	32.7	0	36.900656	148	16	day
156	2022-08-21 17:00:00	sand	1.188	NA	32.7	0	14.5208332	148	17	day
157	2022-08-21 18:00:00	sand	0.576	NA	30.4	1.6	16.8153128	148	18	day
158	2022-08-21 19:00:00	sand	0.684	NA	28.6	1.6	11.729076	148	19	day
159	2022-08-21 20:00:00	sand	0.432	NA	25.9	1.6	1.8557884	148	20	night
160	2022-08-21 21:00:00	sand	0.504	NA	23.5	1.6	0.0045036	148	21	night
161	2022-08-21 22:00:00	sand	0.432	NA	21.5	1.6	-0.041016	148	22	night
162	2022-08-21 23:00:00	sand	0.54	NA	19.9	1.6	-0.0416294	148	23	night
163	2022-08-22 00:00:00	sand	0.36	NA	18.8	1.6	-0.0421144	148	0	night
164	2022-08-22 01:00:00	sand	0.36	NA	17.9	1.5	-0.0439384	147.6	1	night
165	2022-08-22 02:00:00	sand	0.612	NA	16.8	1.5	-0.0409612	147	2	night
166	2022-08-22 03:00:00	sand	-0.216	NA	16	1.6	-0.0428946	147	3	night
167	2022-08-22 04:00:00	sand	0.288	NA	15.4	1.5	-0.0405984	147	4	night
168	2022-08-22 05:00:00	sand	0.108	NA	14.9	1.5	-0.040203	147	5	night
169	2022-08-22 06:00:00	sand	-0.108	NA	14.7	1.3	0.2316998	146.6	6	day
170	2022-08-22 07:00:00	sand	0.252	NA	14.4	1.3	2.4908548	146	7	day
171	2022-08-18 18:00:00	vegetation	5.76	NA	32.7	0.3	7.0706524	140.2	18	day
172	2022-08-18 19:00:00	vegetation	5.616	NA	30.4	0.8	1.984103	140	19	day
173	2022-08-18 20:00:00	vegetation	6.336	NA	26.9	0.5	0.56933	140	20	night
174	2022-08-18 21:00:00	vegetation	5.472	NA	25.6	0.2	-0.0203738	140	21	night
175	2022-08-18 22:00:00	vegetation	5.544	NA	25.1	0.5	-0.0348574	139.2	22	night
176	2022-08-18 23:00:00	vegetation	5.58	NA	24.4	0.5	-0.0368398	139	23	night
177	2022-08-19 00:00:00	vegetation	7.524	NA	23	0.8	-0.0405012	139	0	night
178	2022-08-19 01:00:00	vegetation	6.588	NA	22.6	0.6	-0.0408924	139	1	night
179	2022-08-19 02:00:00	vegetation	7.416	NA	22.4	0	-0.0375062	139	2	night
180	2022-08-19 03:00:00	vegetation	6.768	NA	21.9	0	-0.0394386	139	3	night
181	2022-08-19 04:00:00	vegetation	7.488	NA	21.5	0	-0.0402256	139	4	night
182	2022-08-19 05:00:00	vegetation	7.56	NA	21.1	0.4	-0.0392626	139	5	night
183	2022-08-19 06:00:00	vegetation	6.552	NA	20.9	2.1	0.1097552	139	6	day
184	2022-08-19 07:00:00	vegetation	8.352	NA	20.5	2.6	1.578905	139	7	day
185	2022-08-19 08:00:00	vegetation	9.612	NA	20.9	2.2	2.9497172	139	8	day
186	2022-08-19 09:00:00	vegetation	9.936	NA	21.5	1.9	2.8499808	138.8	9	day
187	2022-08-19 10:00:00	vegetation	10.044	NA	21.7	2.3	10.0347614	139	10	day
188	2022-08-19 11:00:00	vegetation	10.332	NA	21.9	2.3	10.4711294	138.6	11	day
189	2022-08-19 12:00:00	vegetation	10.332	NA	22.1	2.3	27.052506	138	12	day
190	2022-08-19 13:00:00	vegetation	11.7	NA	24.2	2.4	36.6895724	138	13	day
191	2022-08-19 14:00:00	vegetation	11.844	NA	24.9	2.4	30.5633644	138.4	14	day
192	2022-08-19 15:00:00	vegetation	11.592	NA	24.7	2.3	29.1873604	138.6	15	day
193	2022-08-19 16:00:00	vegetation	10.908	NA	24.4	2.3	27.2628592	138.2	16	day
194	2022-08-19 17:00:00	vegetation	10.224	NA	23.5	2.6	14.5026408	138.2	17	day
195	2022-08-19 18:00:00	vegetation	10.476	NA	23.5	2.6	5.5984876	138.2	18	day
196	2022-08-19 19:00:00	vegetation	9.828	NA	23	2.2	2.2914708	138	19	day
197	2022-08-19 20:00:00	vegetation	9.576	NA	22.1	2.2	0.585089	138.2	20	night
198	2022-08-19 21:00:00	vegetation	8.676	NA	20.9	1.9	-0.0012416	138.2	21	night
199	2022-08-19 22:00:00	vegetation	8.748	NA	20.9	1.9	-0.0350566	138.4	22	night
200	2022-08-19 23:00:00	vegetation	8.748	NA	20.5	1.9	-0.0394862	138.8	23	night
201	2022-08-20 00:00:00	vegetation	8.496	NA	20.1	1.8	-0.039243	139	0	night
202	2022-08-20 01:00:00	vegetation	8.244	NA	20.1	1.8	-0.0365868	139	1	night
203	2022-08-20 02:00:00	vegetation	8.316	NA	20.1	1.8	-0.0359512	139.2	2	night
204	2022-08-20 03:00:00	vegetation	7.884	NA	19.7	1.8	-0.0382364	139.8	3	night
205	2022-08-20 04:00:00	vegetation	7.236	NA	19.5	1.8	-0.0432838	140	4	night
206	2022-08-20 05:00:00	vegetation	7.776	NA	19.3	1.8	-0.0409704	140.2	5	night
207	2022-08-20 06:00:00	vegetation	6.84	NA	19.3	2.6	0.3717996	141	6	day
208	2022-08-20 07:00:00	vegetation	7.524	NA	19.5	2.3	3.5435212	141	7	day
209	2022-08-20 08:00:00	vegetation	8.208	NA	20.7	2.6	9.7079218	141.6	8	day
210	2022-08-20 09:00:00	vegetation	8.316	NA	22.1	2.7	21.8073544	142.2	9	day
211	2022-08-20 10:00:00	vegetation	8.784	NA	23.3	3	14.3921964	143	10	day
212	2022-08-20 11:00:00	vegetation	8.82	NA	23.9	2.7	18.5262836	143	11	day
213	2022-08-20 12:00:00	vegetation	9.576	NA	25.1	2.4	27.490592	143.6	12	day
214	2022-08-20 13:00:00	vegetation	9.252	NA	25.6	2.7	16.8339132	143.8	13	day
215	2022-08-20 14:00:00	vegetation	9.108	NA	25.9	2.7	19.0316012	144	14	day
216	2022-08-20 15:00:00	vegetation	8.928	NA	26.2	2.7	24.4559656	144.8	15	day
217	2022-08-20 16:00:00	vegetation	8.532	NA	26.4	2.4	26.110268	145	16	day
218	2022-08-20 17:00:00	vegetation	8.172	NA	24.9	2.4	16.5966724	145.2	17	day
219	2022-08-20 18:00:00	vegetation	7.632	NA	23.7	2	11.3255964	145.4	18	day
220	2022-08-20 19:00:00	vegetation	7.056	NA	23	2.3	8.820762	145.2	19	day
221	2022-08-20 20:00:00	vegetation	6.408	NA	22.4	2.3	2.1547194	146	20	night
222	2022-08-20 21:00:00	vegetation	5.868	NA	20.5	2.2	0.0410806	146	21	night
223	2022-08-20 22:00:00	vegetation	6.228	NA	19.3	2.2	-0.036251	146.2	22	night
224	2022-08-20 23:00:00	vegetation	5.364	NA	18.4	2.5	-0.0390228	146.2	23	night
225	2022-08-21 00:00:00	vegetation	6.012	NA	18	2.5	-0.0387338	146.8	0	night
226	2022-08-21 01:00:00	vegetation	6.012	NA	17.9	2.1	-0.0436914	147	1	night
227	2022-08-21 02:00:00	vegetation	5.652	NA	17.9	2.1	-0.0403614	147	2	night
228	2022-08-21 03:00:00	vegetation	5.184	NA	17.5	2.1	-0.0420904	147	3	night
229	2022-08-21 04:00:00	vegetation	5.076	NA	16.7	1.8	-0.0415088	147.2	4	night
230	2022-08-21 05:00:00	vegetation	4.788	NA	15.5	2.1	-0.0397186	148	5	night
231	2022-08-21 06:00:00	vegetation	4.86	NA	14.9	1.8	0.362922	148	6	day
232	2022-08-21 07:00:00	vegetation	4.824	NA	15	1.8	3.718673	148	7	day
233	2022-08-21 08:00:00	vegetation	5.076	NA	17	2.2	11.1126308	148	8	day
234	2022-08-21 09:00:00	vegetation	5.688	NA	20.5	2.2	24.402234	148	9	day
235	2022-08-21 10:00:00	vegetation	6.948	NA	26.7	2.7	34.476492	148	10	day
236	2022-08-21 11:00:00	vegetation	7.668	NA	31.4	3.1	47.753128	148	11	day
237	2022-08-21 12:00:00	vegetation	7.164	NA	34.6	3.1	58.8856152	148	12	day
238	2022-08-21 13:00:00	vegetation	7.704	NA	35.7	3.5	32.954826	148	13	day
239	2022-08-21 14:00:00	vegetation	7.128	NA	33.1	2.8	39.2489636	148	14	day
240	2022-08-21 15:00:00	vegetation	6.336	NA	29.8	2.4	27.70318	148	15	day
241	2022-08-21 16:00:00	vegetation	6.012	NA	31.1	2.7	36.900656	148	16	day
242	2022-08-21 17:00:00	vegetation	6.084	NA	29.2	2.6	14.5208332	148	17	day
243	2022-08-21 18:00:00	vegetation	5.976	NA	26.7	2.6	16.8153128	148	18	day
244	2022-08-21 19:00:00	vegetation	5.724	NA	25.4	2.2	11.729076	148	19	day
245	2022-08-21 20:00:00	vegetation	5.004	NA	23.5	1.8	1.8557884	148	20	night
246	2022-08-21 21:00:00	vegetation	5.652	NA	21.3	1.8	0.0045036	148	21	night
247	2022-08-21 22:00:00	vegetation	4.716	NA	19.5	2	-0.041016	148	22	night
248	2022-08-21 23:00:00	vegetation	4.212	NA	18	2	-0.0416294	148	23	night
249	2022-08-22 00:00:00	vegetation	4.32	NA	17.2	2.3	-0.0421144	148	0	night
250	2022-08-22 01:00:00	vegetation	3.924	NA	16.7	2	-0.0439384	147.6	1	night
251	2022-08-22 02:00:00	vegetation	3.816	NA	15.8	2	-0.0409612	147	2	night
252	2022-08-22 03:00:00	vegetation	3.708	NA	15	2	-0.0428946	147	3	night
253	2022-08-22 04:00:00	vegetation	3.888	NA	14.6	2	-0.0405984	147	4	night
254	2022-08-22 05:00:00	vegetation	3.24	NA	14	2.2	-0.040203	147	5	night
255	2022-08-22 06:00:00	vegetation	3.24	NA	14.6	2	0.2316998	146.6	6	day
256	2022-08-22 07:00:00	vegetation	3.564	NA	14.4	2.2	2.4908548	146	7	day
257	2022-08-22 08:00:00	vegetation	4.212	NA	17.2	2	12.2694908	146	8	day
258	2022-08-19 17:00:00	water	NA	0.047058064516129	23.275131147541	NA	14.5026408	138.2	17	day
259	2022-08-19 18:00:00	water	1.51289349112426	0.0474032786885246	23.2393442622951	NA	5.5984876	138.2	18	day
260	2022-08-19 19:00:00	water	1.51616816816817	0.0474475409836066	23.2138032786885	NA	2.2914708	138	19	day
261	2022-08-19 20:00:00	water	1.64176276276276	0.0470032786885246	23.1652786885246	NA	0.585089	138.2	20	night
262	2022-08-19 21:00:00	water	1.94937237237237	0.0467918032786885	23.0880327868852	NA	-0.0012416	138.2	21	night
263	2022-08-19 22:00:00	water	2.19184337349398	0.0467409836065574	23.0204098360656	NA	-0.0350566	138.4	22	night
264	2022-08-19 23:00:00	water	2.49264564564565	0.0467213114754098	22.964737704918	NA	-0.0394862	138.8	23	night
265	2022-08-20 00:00:00	water	2.8052972972973	0.0468590163934426	22.8840163934426	NA	-0.039243	139	0	night
266	2022-08-20 01:00:00	water	3.13823423423423	0.0469016393442623	22.8019672131148	NA	-0.0365868	139	1	night
267	2022-08-20 02:00:00	water	3.55969879518072	0.0469754098360656	22.7249180327869	NA	-0.0359512	139.2	2	night
268	2022-08-20 03:00:00	water	3.9493963963964	0.0470868852459016	22.6416229508197	NA	-0.0382364	139.8	3	night
269	2022-08-20 04:00:00	water	4.35551351351351	0.0471852459016393	22.5671967213115	NA	-0.0432838	140	4	night
270	2022-08-20 05:00:00	water	4.71302710843374	0.0471754098360656	22.4926393442623	NA	-0.0409704	140.2	5	night
271	2022-08-20 06:00:00	water	5.10252252252252	0.047316393442623	22.4199508196721	NA	0.3717996	141	6	day
272	2022-08-20 07:00:00	water	5.45437837837838	0.0473786885245902	22.3591803278689	NA	3.5435212	141	7	day
273	2022-08-20 08:00:00	water	5.63534834834835	0.0474016393442623	22.3344754098361	NA	9.7079218	141.6	8	day
274	2022-08-20 09:00:00	water	5.53084036144578	0.0472508196721311	22.3620491803279	NA	21.8073544	142.2	9	day
275	2022-08-20 10:00:00	water	5.31154954954955	0.0476639344262295	22.396737704918	NA	14.3921964	143	10	day
276	2022-08-20 11:00:00	water	4.92472972972973	0.0481426229508197	22.4575245901639	NA	18.5262836	143	11	day
277	2022-08-20 12:00:00	water	4.41958858858859	0.0483180327868852	22.5240327868852	NA	27.490592	143.6	12	day
278	2022-08-20 13:00:00	water	3.78980722891566	0.0475852459016393	22.6092459016393	NA	16.8339132	143.8	13	day
279	2022-08-20 14:00:00	water	3.2742012012012	0.0472672131147541	22.6765737704918	NA	19.0316012	144	14	day
280	2022-08-20 15:00:00	water	2.78081081081081	0.0470049180327869	22.7383442622951	NA	24.4559656	144.8	15	day
281	2022-08-20 16:00:00	water	2.37297590361446	0.0472655737704918	22.7881147540984	NA	26.110268	145	16	day
282	2022-08-20 17:00:00	water	2.03024624624625	0.0475606557377049	22.7994918032787	NA	16.5966724	145.2	17	day
283	2022-08-20 18:00:00	water	1.8070960960961	0.0475426229508197	22.7662950819672	NA	11.3255964	145.4	18	day
284	2022-08-20 19:00:00	water	1.80338438438438	0.0474508196721311	22.7226393442623	NA	8.820762	145.2	19	day
285	2022-08-20 20:00:00	water	1.92661144578313	0.0469459016393443	22.6632459016393	NA	2.1547194	146	20	night
286	2022-08-20 21:00:00	water	2.16675675675676	0.0467524590163934	22.6055901639344	NA	0.0410806	146	21	night
287	2022-08-20 22:00:00	water	2.54778678678679	0.0468229508196721	22.5391639344262	NA	-0.036251	146.2	22	night
288	2022-08-20 23:00:00	water	2.85681081081081	0.0469377049180328	22.470131147541	NA	-0.0390228	146.2	23	night
289	2022-08-21 00:00:00	water	3.30360542168675	0.0469770491803279	22.3996721311475	NA	-0.0387338	146.8	0	night
290	2022-08-21 01:00:00	water	3.7286036036036	0.0471475409836066	22.3249836065574	NA	-0.0436914	147	1	night
291	2022-08-21 02:00:00	water	4.07798498498498	0.0472868852459016	22.257737704918	NA	-0.0403614	147	2	night
292	2022-08-21 03:00:00	water	4.34407228915663	0.0473065573770492	22.1887213114754	NA	-0.0420904	147	3	night
293	2022-08-21 04:00:00	water	4.58561861861862	0.0474639344262295	22.1192295081967	NA	-0.0415088	147.2	4	night
294	2022-08-21 05:00:00	water	4.79522222222222	0.0475672131147541	22.0287704918033	NA	-0.0397186	148	5	night
295	2022-08-21 06:00:00	water	5.07708408408408	0.0477754098360656	21.9232295081967	NA	0.362922	148	6	day
296	2022-08-21 07:00:00	water	5.34229819277108	0.0479	21.8282786885246	NA	3.718673	148	7	day
297	2022-08-21 08:00:00	water	5.52108108108108	0.0479622950819672	21.768737704918	NA	11.1126308	148	8	day
298	2022-08-21 09:00:00	water	5.59251951951952	0.0479737704918033	21.7547213114754	NA	24.402234	148	9	day
299	2022-08-21 10:00:00	water	5.33329429429429	0.0484639344262295	21.8760491803279	NA	34.476492	148	10	day
300	2022-08-21 11:00:00	water	4.75421385542169	0.048283606557377	22.0966885245902	NA	47.753128	148	11	day
301	2022-08-21 12:00:00	water	4.11285885885886	0.0477754098360656	22.4048852459016	NA	58.8856152	148	12	day
302	2022-08-21 13:00:00	water	3.45621921921922	0.0472672131147541	22.716131147541	NA	32.954826	148	13	day
303	2022-08-21 14:00:00	water	2.88113855421687	0.0466868852459016	22.9277049180328	NA	39.2489636	148	14	day
304	2022-08-21 15:00:00	water	NA	0.0460344262295082	23.0943278688525	NA	27.70318	148	15	day
305	2022-08-21 16:00:00	water	1.93184146341463	0.0453819672131148	NA	NA	36.900656	148	16	day
306	2022-08-21 17:00:00	water	NA	0.0455	NA	NA	14.5208332	148	17	day
307	2022-08-21 18:00:00	water	1.0695	NA	NA	NA	16.8153128	148	18	day
308	2022-08-21 19:00:00	water	0.899444444444444	0.0457416666666667	NA	NA	11.729076	148	19	day
309	2022-08-21 20:00:00	water	0.756867867867868	0.046283606557377	23.3023114754098	NA	1.8557884	148	20	night
310	2022-08-21 21:00:00	water	0.871051204819277	0.046655737704918	23.2027868852459	NA	0.0045036	148	21	night
311	2022-08-21 22:00:00	water	1.19438138138138	0.0468344262295082	23.1024590163934	NA	-0.041016	148	22	night
312	2022-08-21 23:00:00	water	1.47611111111111	0.0470196721311475	22.9785967741935	NA	-0.0416294	148	23	night
313	2022-08-22 00:00:00	water	1.6412078313253	0.0472655737704918	22.866131147541	NA	-0.0421144	148	0	night
314	2022-08-22 01:00:00	water	1.9753033033033	0.0473967213114754	22.7660819672131	NA	-0.0439384	147.6	1	night
315	2022-08-22 02:00:00	water	2.18994894894895	0.0476196721311475	22.6468852459016	NA	-0.0409612	147	2	night
316	2022-08-22 03:00:00	water	2.3235015015015	0.0478229508196721	22.5165081967213	NA	-0.0428946	147	3	night
317	2022-08-22 04:00:00	water	2.92521987951807	0.0480754098360656	22.3662131147541	NA	-0.0405984	147	4	night
318	2022-08-22 05:00:00	water	2.93678378378378	0.0483934426229508	22.199606557377	NA	-0.040203	147	5	night
319	2022-08-22 06:00:00	water	3.37221021021021	0.0486573770491803	22.0388196721311	NA	0.2316998	146.6	6	day
320	2022-08-22 07:00:00	water	3.76376276276276	0.049016393442623	21.8832786885246	NA	2.4908548	146	7	day
321	2022-08-22 08:00:00	water	4.2683738317757	0.0493016393442623	21.7658524590164	NA	12.2694908	146	8	day
